# Supplementary material
Source: publisher figshare collection journal article supplement (https://gsapubs.figshare.com/ndownloader/files/23313464)
Supplement: Supplementary file 1 [file 23313464]

## Sheet: TABLE DR5
TABLE DR5. Whole-rock Rb-Sr And Sm-Nd Isotopic Compositions For Quartz Diorite, Dioritic enclaves, Hornblendite And Dolerite Dikes From the Laohushan Pluton, North Qilian
Sample no.	Rock-type	Age	Rb	Sr	87Rb/86Sr	87Sr/86Sr	2σ	87Sr/86Sr(i)	Sm	Nd	147Sm/144Nd	143Nd/144Nd	2σ	εNd(t)	TDM1	TDM2	fSm/Nd
		(Ma)	(ppm)	(ppm)					(ppm)	(ppm)					(Ma)	(Ma)
QLS10-1	Quartz diorite	426	46.694	317.482	0.410648	0.709234	1.59415e-05	0.706742	3.91623	15.9635	0.150841	0.512428	1.07813e-05	-1.60241	1759.71	1301.73	-0.233141
QLS10-3	Granodiorite	430	59.6401	307.695	0.541184	0.710557	1.61969e-05	0.707242	3.56242	18.961	0.115522	0.512297	1.78256e-05	-2.19474	1330.4	1353.94	-0.412701
QLS10-4	Quartz diorite	430	63.9116	288.097	0.619397	0.711671	1.12524e-05	0.707878	3.72157	16.2423	0.140882	0.512334	5.2902e-06	-2.86531	1716.35	1408.66	-0.283772
QLS11-1	Dioritic enclave	430	77.754	483.616	0.4489	0.710376	1.17574e-05	0.707627	3.66109	14.9765	0.150307	0.512509	1.77554e-05	0.0322224	1549.04	1171.03	-0.235857
QLS11-3	Dioritic enclave	430	54.9271	252.422	0.607558	0.710514	1.39153e-05	0.706793	8.07352	35.0695	0.141551	0.512348	3.05924e-06	-2.62712	1702.37	1389.13	-0.280373
QLS11-3-2	Dioritic enclave	430	91.8658	507.236	0.505675	0.709706	1.70774e-05	0.706609	4.51449	30.0782	0.092286	0.511875	1.18824e-05	-9.15775	1608.05	1925.22	-0.530829
QLS12-2-1	Hornblendite	448	1.18581	33.8642	0.0977693	0.707929	1.57487e-05	0.707305	1.67119	5.93749	0.173063	0.512424	3.93588e-06	-2.82862	2740.18	1420.17	-0.12017
QLS06-1	Dolerite dike	427	17.5	530	0.0921912	0.706501	5e-06	0.70594	11.6	81.4	0.0876218	0.512301	6e-06	-0.624203	1030.91	1222.97	-0.554541
QLS07-1	Dolerite dike	427	16.3	724.3	0.062834	0.70653	6e-06	0.705969	8.69	57	0.0937	0.512304	8e-06	-0.565619	1027.26	1218.17	-0.554541
Note: εNd= ([143Nd/144Nd]s/[143Nd/144Nd]CHUR – 1)× 10000, and fSm/Nd= (147Sm/144Nd)s/(147Sm/144Nd)CHUR – 1, s= sample, (143Nd/144Nd)CHUR= 0.512638, and (147Sm/144Nd)CHUR= 0.1967. The depleted mantle model ages (TDM) were calculated using a linear isotopic ratio growth equation: TDM= 1/λ× ln{1+ ([143Nd/144Nd]s –0.51315)/([147Sm/144Nd]s – 0.2137)}. CHUR-chondritic uniform reservoir.
